# Supplementary material for: The Ankyrin-Repeat Gene GmANK114 Confers Drought and Salt Tolerance in Arabidopsis and Soybean
Source: Front Plant Sci. 2020 Oct 29;11:584167. doi: 10.3389/fpls.2020.584167 (PMC7658197; doi:10.3389/fpls.2020.584167)
Supplement: Supplementary Table 2 — FPKM values of different tissues of soybean ANK-RF genes. [file Table_2.XLSX]

## Sheet: Sheet1
FPKM		Root	Root Hairs	Stem	Leaves	Nodules	Flower	Seed
	GmANK35	2.862	4.96	6.085	6.186	4.837	4.972	5.884
	GmANK88	10.325	0.667	0.641	0.232	1.363	0.566	0.102
	GmANK89	29.058	58.476	57.96	45.441	46.124	99.783	70.945
	GmANK103	6.588	9.486	9.371	0.753	8.685	4.953	3.861
	GmANK114	11.289	5.673	9.533	6.037	6.747	14.005	5.24
	GmANK115	11.355	9.191	10.61	8.463	10.117	9.395	6.891
	GmANK121	4.13	10.514	6.702	4.907	3.428	1.792	1.206
	GmANK122	3.801	6.729	6.531	6.563	6.103	7.757	7.412
	GmANK128	4.467	12.78	4.748	2.541	4.185	3.697	2.506
	GmANK136	23.562	7.986	6.706	10.58	15.352	19.668	1.806
	GmANK151	10.778	10.282	26.363	9.142	6.05	4.987	10.342
	GmANK163	14.933	25.448	37.767	8.75	13.381	8.517	20.883
	GmANK183	5.351	5.861	5.99	2.646	4.999	7.215	5.206
	GmANK188	16.651	4.166	5.109	4.724	5.888	12.538	3.139
	GmANK201	29.416	25.528	23.634	19.244	24.852	102.12	30.442
	GmANK220	16.797	8.162	12.099	15.887	8.647	45.841	6.887
	GmANK221	4.762	3.901	6.798	4.196	3.813	6.837	4.301
Log2 of FPKM		Root	Root Hairs	Stem	Leaves	Nodules	Flower	Seed
	GmANK35	1.51702	2.31034	2.60526	2.62901	2.27411	2.31383	2.5568
	GmANK88	3.36807	-0.584241	-0.641604	-2.1078	0.446786	-0.821126	-3.29336
	GmANK89	4.86086	5.86977	5.85699	5.50592	5.52745	6.64072	6.14863
	GmANK103	2.71984	3.2458	3.2282	-0.409278	3.11853	2.3083	1.94897
	GmANK114	3.49685	2.50411	3.25293	2.59383	2.75425	3.80787	2.38957
	GmANK115	3.50526	3.20022	3.40735	3.08117	3.33871	3.23189	2.78471
	GmANK121	2.04614	3.39424	2.74459	2.29484	1.77737	0.841571	0.27023
	GmANK122	1.92638	2.75039	2.7073	2.71436	2.60952	2.9555	2.88986
	GmANK128	2.15931	3.67582	2.24732	1.3454	2.06523	1.88636	1.32539
	GmANK136	4.55839	2.99747	2.74545	3.40327	3.94035	4.29778	0.852798
	GmANK151	3.43002	3.36205	4.72044	3.19251	2.59694	2.31817	3.37044
	GmANK163	3.90043	4.66948	5.23905	3.12928	3.74211	3.09035	4.38426
	GmANK183	2.41981	2.55115	2.58256	1.40381	2.32164	2.851	2.38018
	GmANK188	4.05754	2.05866	2.35304	2.24001	2.55778	3.64824	1.65031
	GmANK201	4.87853	4.67401	4.56279	4.26634	4.63529	6.67412	4.92799
	GmANK220	4.07013	3.02892	3.59682	3.98977	3.1122	5.51857	2.78388
	GmANK221	2.25157	1.96384	2.76511	2.06901	1.93093	2.77336	2.10467
