# Supplementary material for: The Ankyrin-Repeat Gene GmANK114 Confers Drought and Salt Tolerance in Arabidopsis and Soybean
Source: Front Plant Sci. 2020 Oct 29;11:584167. doi: 10.3389/fpls.2020.584167 (PMC7658197; doi:10.3389/fpls.2020.584167)
Supplement: Supplementary Table 3 — FPKM values under drought, NaCl, and ABA treatment of soybean ANK-RF genes. [file Table_3.XLSX]

## Sheet: Drought
		GeneID	Length	CK_treat-Expression	GH_treat-Expression	log2 Fold Change(GH_treat/CK_treat)	Padj	Up/Down-Regulation	Pvalue	Symbol	Cellular Component	Molecular Function	Biological Process	Kegg Orthology	Nr Description
GmANK35	Glyma.04G134700	100782956	5957	1364	3197.32	1.22902	6.39e-87	Up	7.95e-88	LOC100782956	NA	NA	NA	K16279//E3 ubiquitin-protein ligase KEG [EC:2.7.11.1 2.3.2.27]	gi|356508302|ref|XP_003522897.1|//PREDICTED: E3 ubiquitin-protein ligase KEG-like isoform X2 [Glycine max];gi|571450433|ref|XP_006578425.1|//PREDICTED: E3 ubiquitin-protein ligase KEG-like isoform X1 [Glycine max]
GmANK88	Glyma.08G315500	100795210	1205	1.50311	4.33155	1.52693	0.340105	*	0.277802	LOC100795210	NA	NA	NA	K19044//E3 ubiquitin-protein ligase XBAT32/33 [EC:2.3.2.27]	gi|955337895|ref|XP_006586080.2|//PREDICTED: E3 ubiquitin-protein ligase XB3-like [Glycine max]
GmANK89	Glyma.08G358300	100797347	1775	1628.66	2983.28	0.873214	6.45e-44	*	1.34e-44	LOC100797347	NA	NA	NA	K19044//E3 ubiquitin-protein ligase XBAT32/33 [EC:2.3.2.27]	gi|356527429|ref|XP_003532313.1|//PREDICTED: putative E3 ubiquitin-protein ligase XBAT31 [Glycine max]
GmANK103	Glyma.09G143600	100784143	2424	216.344	1784.01	3.04372	4.67e-227	Up	2.31e-228	LOC100784143	NA	GO:0046914//transition metal ion binding	NA	K19044//E3 ubiquitin-protein ligase XBAT32/33 [EC:2.3.2.27]	gi|356530884|ref|XP_003534009.1|//PREDICTED: E3 ubiquitin-protein ligase XBAT33-like [Glycine max]
GmANK114	Glyma.10G181100	100789309	1985	239.355	1223.76	2.35409	2.23e-120	Up	2.09e-121	LOC100789309	NA	NA	NA	K01931//protein neuralized [EC:2.3.2.27];K06867//uncharacterized protein;K15502//serine/threonine-protein phosphatase 6 regulatory ankyrin repeat subunit A;K15688//E3 ubiquitin-protein ligase MUL1 [EC:2.3.2.27]	gi|571483543|ref|XP_006589266.1|//PREDICTED: putative E3 ubiquitin-protein ligase XBAT34 [Glycine max]
GmANK115	Glyma.10G238000	100793886	1988	483.092	862.568	0.836342	1.89e-19	*	6.15e-20	LOC100793886	NA	GO:0046914//transition metal ion binding;GO:0008270//zinc ion binding	NA	K19044//E3 ubiquitin-protein ligase XBAT32/33 [EC:2.3.2.27]	gi|955347137|ref|XP_014618843.1|//PREDICTED: E3 ubiquitin-protein ligase XBAT33-like isoform X1 [Glycine max];gi|356535892|ref|XP_003536476.1|//PREDICTED: E3 ubiquitin-protein ligase XBAT33-like isoform X2 [Glycine max]
GmANK121	Glyma.11G140000	100800611	2172	570.187	1508.66	1.40377	4.62e-73	Up	6.66e-74	LOC100800611	NA	NA	NA	K19044//E3 ubiquitin-protein ligase XBAT32/33 [EC:2.3.2.27]	gi|356541240|ref|XP_003539087.1|//PREDICTED: putative E3 ubiquitin-protein ligase XBAT31 [Glycine max]
GmANK122	Glyma.11G157400	100777576	5935	1689.3	3821.74	1.17781	7.38e-77	Up	1.02e-77	LOC100777576	NA	GO:0032559//adenyl ribonucleotide binding;GO:0016301//kinase activity;GO:0046914//transition metal ion binding	GO:0006464//cellular protein modification process	K16279//E3 ubiquitin-protein ligase KEG [EC:2.7.11.1 2.3.2.27]	gi|356539563|ref|XP_003538267.1|//PREDICTED: E3 ubiquitin-protein ligase KEG-like [Glycine max]
GmANK128	Glyma.12G063600	100815043	2128	424.323	582.364	0.456761	0.000121344	*	6.66e-05	LOC100815043	NA	GO:0008270//zinc ion binding;GO:0016874//ligase activity	NA	K19044//E3 ubiquitin-protein ligase XBAT32/33 [EC:2.3.2.27]	gi|356542447|ref|XP_003539678.1|//PREDICTED: putative E3 ubiquitin-protein ligase XBAT31 [Glycine max]
GmANK136	Glyma.13G091900	100801375	2777	659.992	2374.23	1.84694	8.06e-114	Up	7.98e-115	LOC100801375	NA	GO:0046872//metal ion binding;GO:0046914//transition metal ion binding;GO:0008270//zinc ion binding;GO:0016874//ligase activity	NA	K19044//E3 ubiquitin-protein ligase XBAT32/33 [EC:2.3.2.27]	gi|356547802|ref|XP_003542295.1|//PREDICTED: E3 ubiquitin-protein ligase XBAT32 isoform X1 [Glycine max]
GmANK151	Glyma.13G335300	100786708	2104	795.585	2211.48	1.47492	1.21e-78	Up	1.65e-79	LOC100786708	NA	NA	NA	K19044//E3 ubiquitin-protein ligase XBAT32/33 [EC:2.3.2.27]	gi|356550271|ref|XP_003543511.1|//PREDICTED: putative E3 ubiquitin-protein ligase XBAT31 [Glycine max]
GmANK163	Glyma.15G039100	100820268	2113	529.882	1051.54	0.988768	8.23e-24	*	2.43e-24	LOC100820268	NA	NA	NA	K19044//E3 ubiquitin-protein ligase XBAT32/33 [EC:2.3.2.27]	gi|356558143|ref|XP_003547367.1|//PREDICTED: putative E3 ubiquitin-protein ligase XBAT31 [Glycine max]
GmANK183	Glyma.16G196400	100812809	2427	391.138	240.425	-0.702094	5.57e-07	*	2.68e-07	LOC100812809	NA	GO:0046914//transition metal ion binding	NA	K19044//E3 ubiquitin-protein ligase XBAT32/33 [EC:2.3.2.27]	gi|571529727|ref|XP_006599617.1|//PREDICTED: E3 ubiquitin-protein ligase XBAT33-like isoform X2 [Glycine max];gi|356559851|ref|XP_003548210.1|//PREDICTED: E3 ubiquitin-protein ligase XBAT33-like isoform X1 [Glycine max]
GmANK188	Glyma.17G068400	100813190	2882	812.666	1079.16	0.409172	1.52e-06	*	7.45e-07	LOC100813190	NA	GO:0046872//metal ion binding;GO:0008270//zinc ion binding;GO:0016874//ligase activity	NA	K19044//E3 ubiquitin-protein ligase XBAT32/33 [EC:2.3.2.27]	gi|571534287|ref|XP_006600509.1|//PREDICTED: E3 ubiquitin-protein ligase XBAT32-like [Glycine max]
GmANK201	Glyma.18G176600	100811410	1814	487.446	1523.07	1.64367	9.76e-85	Up	1.24e-85	LOC100811410	NA	NA	NA	K19044//E3 ubiquitin-protein ligase XBAT32/33 [EC:2.3.2.27]	gi|356567907|ref|XP_003552156.1|//PREDICTED: putative E3 ubiquitin-protein ligase XBAT31 [Glycine max]
GmANK220	Glyma.20G156600	100785638	2272	676.626	2573.73	1.92743	3.47e-167	Up	2.35e-168	LOC100785638	NA	GO:0046872//metal ion binding;GO:0046914//transition metal ion binding;GO:0008270//zinc ion binding	NA	K19044//E3 ubiquitin-protein ligase XBAT32/33 [EC:2.3.2.27]	gi|955393746|ref|XP_014628374.1|//PREDICTED: E3 ubiquitin-protein ligase XBAT33-like isoform X2 [Glycine max];gi|356575939|ref|XP_003556093.1|//PREDICTED: E3 ubiquitin-protein ligase XBAT33-like isoform X1 [Glycine max]
GmANK221	Glyma.20G209400	100805974	1966	219.487	501.512	1.19215	1.4e-20	Up	4.42e-21	LOC100805974	NA	NA	NA	K01931//protein neuralized [EC:2.3.2.27];K06867//uncharacterized protein;K15502//serine/threonine-protein phosphatase 6 regulatory ankyrin repeat subunit A;K13118//protein DGCR14	gi|571569400|ref|XP_006606389.1|//PREDICTED: putative E3 ubiquitin-protein ligase XBAT34 [Glycine max]

## Sheet: NaCl
		GeneID	Length	CK_treat-Expression	NaCl_treat-Expression	log2 Fold Change(NaCl_treat/CK_treat)	Padj	Up/Down-Regulation	Pvalue	Symbol	Cellular Component	Molecular Function	Biological Process	Kegg Orthology	Nr Description
GmANK35	Glyma.04G134700	100782956	5957	1530.08	1806.97	0.239969	0.00957403	*	0.00351389	LOC100782956	NA	NA	NA	K16279//E3 ubiquitin-protein ligase KEG [EC:2.7.11.1 2.3.2.27]	gi|356508302|ref|XP_003522897.1|//PREDICTED: E3 ubiquitin-protein ligase KEG-like isoform X2 [Glycine max];gi|571450433|ref|XP_006578425.1|//PREDICTED: E3 ubiquitin-protein ligase KEG-like isoform X1 [Glycine max]
GmANK88	Glyma.08G315500	100795210	1205	2.10705	4.39698	1.06129	0.462119	*	0.301483	LOC100795210	NA	NA	NA	K19044//E3 ubiquitin-protein ligase XBAT32/33 [EC:2.3.2.27]	gi|955337895|ref|XP_006586080.2|//PREDICTED: E3 ubiquitin-protein ligase XB3-like [Glycine max]
GmANK89	Glyma.08G358300	100797347	1775	1827.52	2584.92	0.500233	2.1e-09	*	3.57e-10	LOC100797347	NA	NA	NA	K19044//E3 ubiquitin-protein ligase XBAT32/33 [EC:2.3.2.27]	gi|356527429|ref|XP_003532313.1|//PREDICTED: putative E3 ubiquitin-protein ligase XBAT31 [Glycine max]
GmANK103	Glyma.09G143600	100784143	2424	242.491	306.292	0.336975	0.130422	*	0.0651324	LOC100784143	NA	GO:0046914//transition metal ion binding	NA	K19044//E3 ubiquitin-protein ligase XBAT32/33 [EC:2.3.2.27]	gi|356530884|ref|XP_003534009.1|//PREDICTED: E3 ubiquitin-protein ligase XBAT33-like [Glycine max]
GmANK114	Glyma.10G181100	100789309	1985	269.364	744.852	1.4674	7.42e-23	Up	6.12e-24	LOC100789309	NA	NA	NA	K01931//protein neuralized [EC:2.3.2.27];K06867//uncharacterized protein;K15502//serine/threonine-protein phosphatase 6 regulatory ankyrin repeat subunit A;K15688//E3 ubiquitin-protein ligase MUL1 [EC:2.3.2.27]	gi|571483543|ref|XP_006589266.1|//PREDICTED: putative E3 ubiquitin-protein ligase XBAT34 [Glycine max]
GmANK115	Glyma.10G238000	100793886	1970	541.852	564.429	0.0588932	0.771873	*	0.658216	LOC100793886	NA	GO:0046914//transition metal ion binding;GO:0008270//zinc ion binding	NA	K19044//E3 ubiquitin-protein ligase XBAT32/33 [EC:2.3.2.27]	gi|955347137|ref|XP_014618843.1|//PREDICTED: E3 ubiquitin-protein ligase XBAT33-like isoform X1 [Glycine max];gi|356535892|ref|XP_003536476.1|//PREDICTED: E3 ubiquitin-protein ligase XBAT33-like isoform X2 [Glycine max]
GmANK121	Glyma.11G140000	100800611	2172	639.887	1020.17	0.672928	6.59e-09	*	1.17e-09	LOC100800611	NA	NA	NA	K19044//E3 ubiquitin-protein ligase XBAT32/33 [EC:2.3.2.27]	gi|356541240|ref|XP_003539087.1|//PREDICTED: putative E3 ubiquitin-protein ligase XBAT31 [Glycine max]
GmANK122	Glyma.11G157400	100777576	5935	1894.62	2235.19	0.238492	0.0339418	*	0.0141864	LOC100777576	NA	GO:0032559//adenyl ribonucleotide binding;GO:0016301//kinase activity;GO:0046914//transition metal ion binding	GO:0006464//cellular protein modification process	K16279//E3 ubiquitin-protein ligase KEG [EC:2.7.11.1 2.3.2.27]	gi|356539563|ref|XP_003538267.1|//PREDICTED: E3 ubiquitin-protein ligase KEG-like [Glycine max]
GmANK128	Glyma.12G063600	100815043	2115	475.765	387.028	-0.297813	0.106152	*	0.0514401	LOC100815043	NA	GO:0008270//zinc ion binding;GO:0016874//ligase activity	NA	K19044//E3 ubiquitin-protein ligase XBAT32/33 [EC:2.3.2.27]	gi|356542447|ref|XP_003539678.1|//PREDICTED: putative E3 ubiquitin-protein ligase XBAT31 [Glycine max]
GmANK136	Glyma.13G091900	100801375	2850	740.585	947.467	0.355411	0.00472144	*	0.00163613	LOC100801375	NA	GO:0046872//metal ion binding;GO:0046914//transition metal ion binding;GO:0008270//zinc ion binding;GO:0016874//ligase activity	NA	K19044//E3 ubiquitin-protein ligase XBAT32/33 [EC:2.3.2.27]	gi|356547802|ref|XP_003542295.1|//PREDICTED: E3 ubiquitin-protein ligase XBAT32 isoform X1 [Glycine max]
GmANK151	Glyma.13G335300	100786708	2104	892.834	1662.72	0.897085	3.95e-17	*	4.19e-18	LOC100786708	NA	NA	NA	K19044//E3 ubiquitin-protein ligase XBAT32/33 [EC:2.3.2.27]	gi|356550271|ref|XP_003543511.1|//PREDICTED: putative E3 ubiquitin-protein ligase XBAT31 [Glycine max]
GmANK163	Glyma.15G039100	100820268	2113	594.62	907.785	0.610382	5.04e-06	*	1.16e-06	LOC100820268	NA	NA	NA	K19044//E3 ubiquitin-protein ligase XBAT32/33 [EC:2.3.2.27]	gi|356558143|ref|XP_003547367.1|//PREDICTED: putative E3 ubiquitin-protein ligase XBAT31 [Glycine max]
GmANK183	Glyma.16G196400	100812809	2427	438.681	377.676	-0.216021	0.266813	*	0.151607	LOC100812809	NA	GO:0046914//transition metal ion binding	NA	K19044//E3 ubiquitin-protein ligase XBAT32/33 [EC:2.3.2.27]	gi|571529727|ref|XP_006599617.1|//PREDICTED: E3 ubiquitin-protein ligase XBAT33-like isoform X2 [Glycine max];gi|356559851|ref|XP_003548210.1|//PREDICTED: E3 ubiquitin-protein ligase XBAT33-like isoform X1 [Glycine max]
GmANK188	Glyma.17G068400	100813190	2946	911.377	737.475	-0.305453	0.0242261	*	0.00973657	LOC100813190	NA	GO:0046872//metal ion binding;GO:0008270//zinc ion binding;GO:0016874//ligase activity	NA	K19044//E3 ubiquitin-protein ligase XBAT32/33 [EC:2.3.2.27]	gi|571534287|ref|XP_006600509.1|//PREDICTED: E3 ubiquitin-protein ligase XBAT32-like [Glycine max]
GmANK201	Glyma.18G176600	100811410	1814	547.227	1056.51	0.949094	6.91e-14	*	8.69e-15	LOC100811410	NA	NA	NA	K19044//E3 ubiquitin-protein ligase XBAT32/33 [EC:2.3.2.27]	gi|356567907|ref|XP_003552156.1|//PREDICTED: putative E3 ubiquitin-protein ligase XBAT31 [Glycine max]
GmANK220	Glyma.20G156600	100785638	2261	759.305	968.804	0.351525	0.00410829	*	0.00140843	LOC100785638	NA	GO:0046872//metal ion binding;GO:0046914//transition metal ion binding;GO:0008270//zinc ion binding	NA	K19044//E3 ubiquitin-protein ligase XBAT32/33 [EC:2.3.2.27]	gi|955393746|ref|XP_014628374.1|//PREDICTED: E3 ubiquitin-protein ligase XBAT33-like isoform X2 [Glycine max];gi|356575939|ref|XP_003556093.1|//PREDICTED: E3 ubiquitin-protein ligase XBAT33-like isoform X1 [Glycine max]
GmANK221	Glyma.20G209400	100805974	1966	246.498	363.095	0.558768	0.00434469	*	0.00149595	LOC100805974	NA	NA	NA	K01931//protein neuralized [EC:2.3.2.27];K06867//uncharacterized protein;K15502//serine/threonine-protein phosphatase 6 regulatory ankyrin repeat subunit A;K13118//protein DGCR14	gi|571569400|ref|XP_006606389.1|//PREDICTED: putative E3 ubiquitin-protein ligase XBAT34 [Glycine max]

## Sheet: ABA
		GeneID	Length	CK_treat-Expression	ABA_treat-Expression	log2 Fold Change(ABA_treat/CK_treat)	Padj	Up/Down-Regulation	Pvalue	Symbol	Cellular Component	Molecular Function	Biological Process	Kegg Orthology	Nr Description
GmANK35	Glyma.04G134700	100782956	5957	1612.93	1764.3	0.129411	0.0865032	*	0.03672	LOC100782956	NA	NA	NA	K16279//E3 ubiquitin-protein ligase KEG [EC:2.7.11.1 2.3.2.27]	gi|356508302|ref|XP_003522897.1|//PREDICTED: E3 ubiquitin-protein ligase KEG-like isoform X2 [Glycine max];gi|571450433|ref|XP_006578425.1|//PREDICTED: E3 ubiquitin-protein ligase KEG-like isoform X1 [Glycine max]
GmANK88	Glyma.08G315500	100795210	1205	1.9574	2.48023	0.34154	0.770394	*	0.644205	LOC100795210	NA	NA	NA	K19044//E3 ubiquitin-protein ligase XBAT32/33 [EC:2.3.2.27]	gi|955337895|ref|XP_006586080.2|//PREDICTED: E3 ubiquitin-protein ligase XB3-like [Glycine max]
GmANK89	Glyma.08G358300	100797347	1775	1926.41	2743.12	0.509901	2.08118e-17	*	1.49164e-18	LOC100797347	NA	NA	NA	K19044//E3 ubiquitin-protein ligase XBAT32/33 [EC:2.3.2.27]	gi|356527429|ref|XP_003532313.1|//PREDICTED: putative E3 ubiquitin-protein ligase XBAT31 [Glycine max]
GmANK103	Glyma.09G143600	100784143	2424	255.198	221.233	-0.206049	0.333903	*	0.188263	LOC100784143	NA	GO:0046914//transition metal ion binding	NA	K19044//E3 ubiquitin-protein ligase XBAT32/33 [EC:2.3.2.27]	gi|356530884|ref|XP_003534009.1|//PREDICTED: E3 ubiquitin-protein ligase XBAT33-like [Glycine max]
GmANK114	Glyma.10G181100	100789309	1985	283.5	459.604	0.697039	2.06515e-07	*	3.23089e-08	LOC100789309	NA	NA	NA	K01931//protein neuralized [EC:2.3.2.27];K06867//uncharacterized protein;K15502//serine/threonine-protein phosphatase 6 regulatory ankyrin repeat subunit A;K15688//E3 ubiquitin-protein ligase MUL1 [EC:2.3.2.27]	gi|571483543|ref|XP_006589266.1|//PREDICTED: putative E3 ubiquitin-protein ligase XBAT34 [Glycine max]
GmANK115	Glyma.10G238000	100793886	1977	571.288	611.881	0.0990327	0.485601	*	0.308323	LOC100793886	NA	GO:0046914//transition metal ion binding;GO:0008270//zinc ion binding	NA	K19044//E3 ubiquitin-protein ligase XBAT32/33 [EC:2.3.2.27]	gi|955347137|ref|XP_014618843.1|//PREDICTED: E3 ubiquitin-protein ligase XBAT33-like isoform X1 [Glycine max];gi|356535892|ref|XP_003536476.1|//PREDICTED: E3 ubiquitin-protein ligase XBAT33-like isoform X2 [Glycine max]
GmANK121	Glyma.11G140000	100800611	2172	673.98	638.367	-0.0783192	0.580008	*	0.398576	LOC100800611	NA	NA	NA	K19044//E3 ubiquitin-protein ligase XBAT32/33 [EC:2.3.2.27]	gi|356541240|ref|XP_003539087.1|//PREDICTED: putative E3 ubiquitin-protein ligase XBAT31 [Glycine max]
GmANK122	Glyma.11G157400	100777576	5935	1997.33	2061.89	0.0458957	0.655297	*	0.47794	LOC100777576	NA	GO:0032559//adenyl ribonucleotide binding;GO:0016301//kinase activity;GO:0046914//transition metal ion binding	GO:0006464//cellular protein modification process	K16279//E3 ubiquitin-protein ligase KEG [EC:2.7.11.1 2.3.2.27]	gi|356539563|ref|XP_003538267.1|//PREDICTED: E3 ubiquitin-protein ligase KEG-like [Glycine max]
GmANK128	Glyma.12G063600	100815043	2118	501.976	571.318	0.186675	0.203403	*	0.101631	LOC100815043	NA	GO:0008270//zinc ion binding;GO:0016874//ligase activity	NA	K19044//E3 ubiquitin-protein ligase XBAT32/33 [EC:2.3.2.27]	gi|356542447|ref|XP_003539678.1|//PREDICTED: putative E3 ubiquitin-protein ligase XBAT31 [Glycine max]
GmANK136	Glyma.13G091900	100801375	2600	780.512	889.906	0.189231	0.0746669	*	0.0309626	LOC100801375	NA	GO:0046872//metal ion binding;GO:0046914//transition metal ion binding;GO:0008270//zinc ion binding;GO:0016874//ligase activity	NA	K19044//E3 ubiquitin-protein ligase XBAT32/33 [EC:2.3.2.27]	gi|356547802|ref|XP_003542295.1|//PREDICTED: E3 ubiquitin-protein ligase XBAT32 isoform X1 [Glycine max]
GmANK151	Glyma.13G335300	100786708	2104	940.987	1338.31	0.508164	2.66277e-09	*	3.41438e-10	LOC100786708	NA	NA	NA	K19044//E3 ubiquitin-protein ligase XBAT32/33 [EC:2.3.2.27]	gi|356550271|ref|XP_003543511.1|//PREDICTED: putative E3 ubiquitin-protein ligase XBAT31 [Glycine max]
GmANK163	Glyma.15G039100	100820268	2113	626.945	856.788	0.450599	7.01454e-05	*	1.51333e-05	LOC100820268	NA	NA	NA	K19044//E3 ubiquitin-protein ligase XBAT32/33 [EC:2.3.2.27]	gi|356558143|ref|XP_003547367.1|//PREDICTED: putative E3 ubiquitin-protein ligase XBAT31 [Glycine max]
GmANK183	Glyma.16G196400	100812809	2425	462.365	355.387	-0.379642	0.00396954	*	0.00116379	LOC100812809	NA	GO:0046914//transition metal ion binding	NA	K19044//E3 ubiquitin-protein ligase XBAT32/33 [EC:2.3.2.27]	gi|571529727|ref|XP_006599617.1|//PREDICTED: E3 ubiquitin-protein ligase XBAT33-like isoform X2 [Glycine max];gi|356559851|ref|XP_003548210.1|//PREDICTED: E3 ubiquitin-protein ligase XBAT33-like isoform X1 [Glycine max]
GmANK188	Glyma.17G068400	100813190	3190	960.422	556.268	-0.787889	5.31564e-18	*	3.68174e-19	LOC100813190	NA	GO:0046872//metal ion binding;GO:0008270//zinc ion binding;GO:0016874//ligase activity	NA	K19044//E3 ubiquitin-protein ligase XBAT32/33 [EC:2.3.2.27]	gi|571534287|ref|XP_006600509.1|//PREDICTED: E3 ubiquitin-protein ligase XBAT32-like [Glycine max]
GmANK201	Glyma.18G176600	100811410	1814	577.012	1138.76	0.980796	2.83048e-28	*	1.19885e-29	LOC100811410	NA	NA	NA	K19044//E3 ubiquitin-protein ligase XBAT32/33 [EC:2.3.2.27]	gi|356567907|ref|XP_003552156.1|//PREDICTED: putative E3 ubiquitin-protein ligase XBAT31 [Glycine max]
GmANK220	Glyma.20G156600	100785638	2265	800.334	957.859	0.259211	0.00610881	*	0.00186112	LOC100785638	NA	GO:0046872//metal ion binding;GO:0046914//transition metal ion binding;GO:0008270//zinc ion binding	NA	K19044//E3 ubiquitin-protein ligase XBAT32/33 [EC:2.3.2.27]	gi|955393746|ref|XP_014628374.1|//PREDICTED: E3 ubiquitin-protein ligase XBAT33-like isoform X2 [Glycine max];gi|356575939|ref|XP_003556093.1|//PREDICTED: E3 ubiquitin-protein ligase XBAT33-like isoform X1 [Glycine max]
GmANK221	Glyma.20G209400	100805974	1966	259.767	339.942	0.388073	0.0146821	*	0.00491601	LOC100805974	NA	NA	NA	K01931//protein neuralized [EC:2.3.2.27];K06867//uncharacterized protein;K15502//serine/threonine-protein phosphatase 6 regulatory ankyrin repeat subunit A;K13118//protein DGCR14	gi|571569400|ref|XP_006606389.1|//PREDICTED: putative E3 ubiquitin-protein ligase XBAT34 [Glycine max]
